# Supplementary figures and images for: Integrated Analysis of Single-Cell RNA-Seq and Bulk RNA-Seq Unravels the Molecular Feature of Tumor-Associated Macrophage of Acute Myeloid Leukemia
Source: Hindawi journal article supplement (doi:10.1155/2024/5539065), 2024-01-02

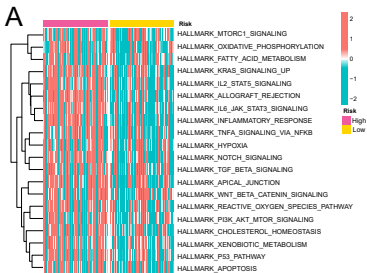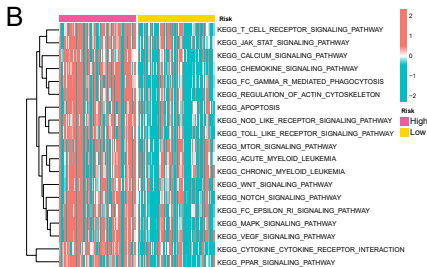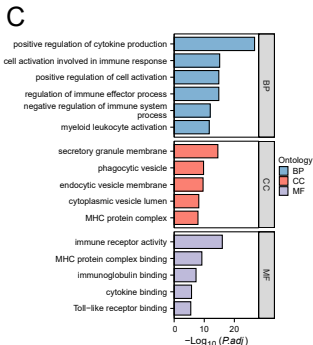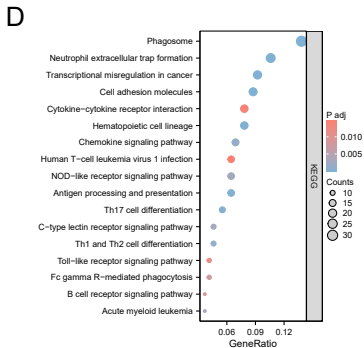

Supplement: f1 [file 5539065.f1.zip]

A

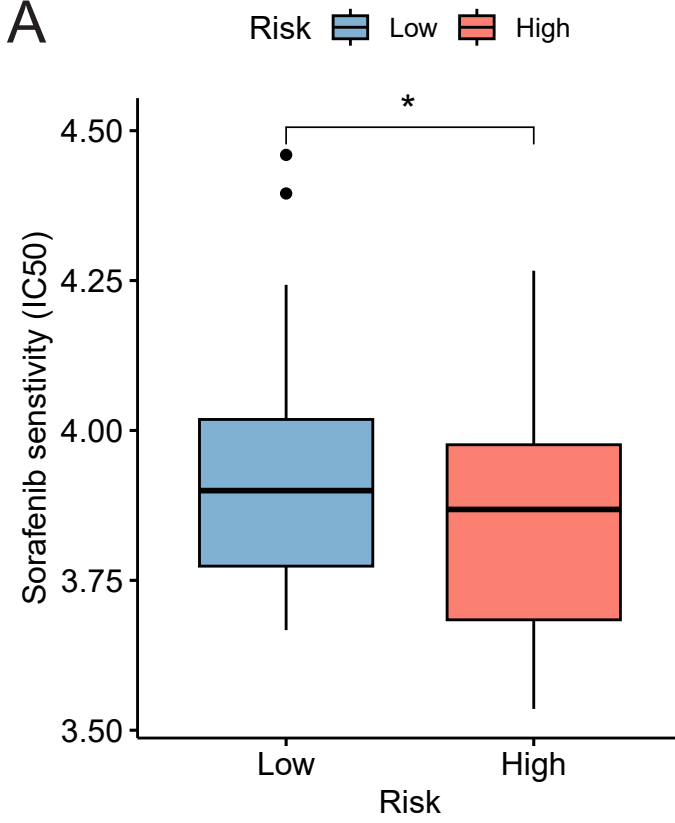

B

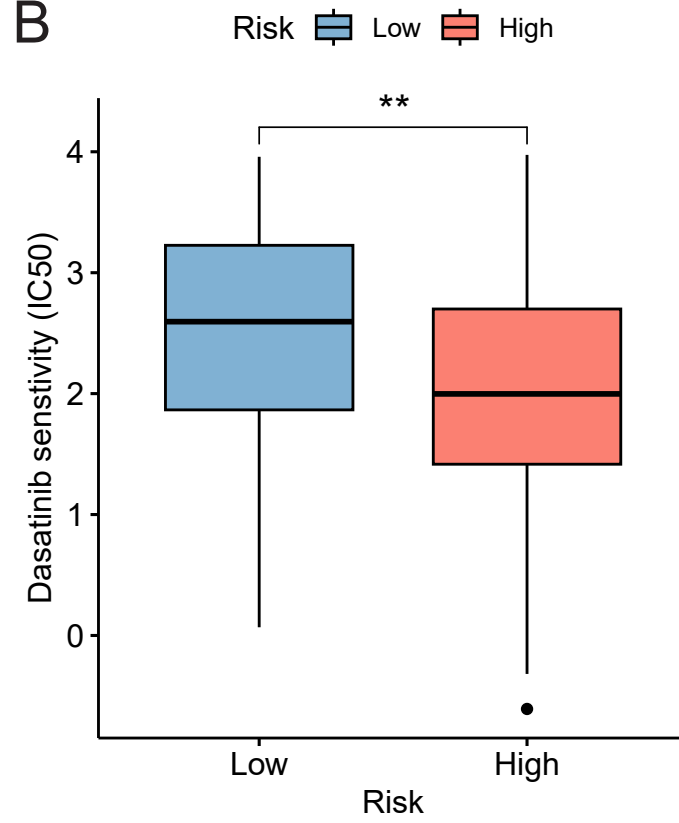

C

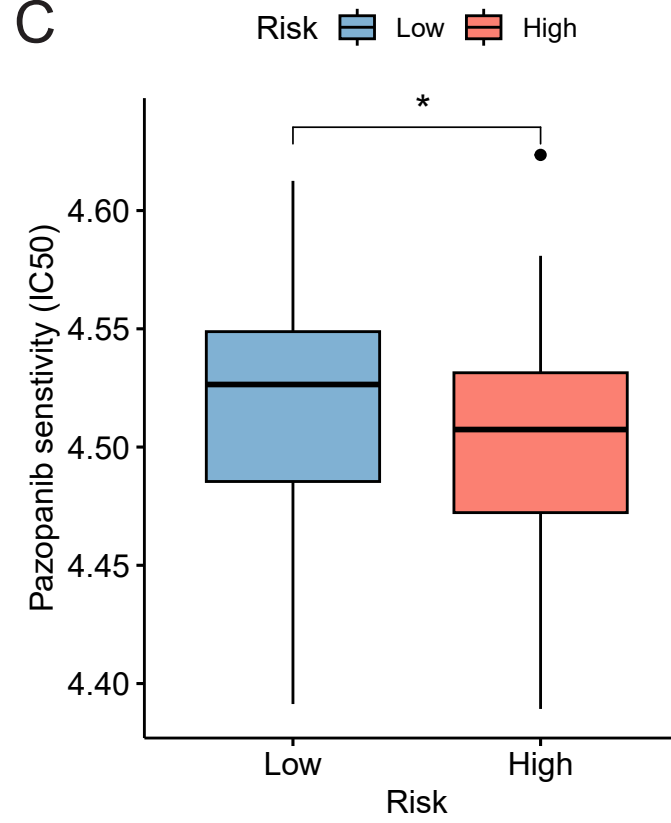

D

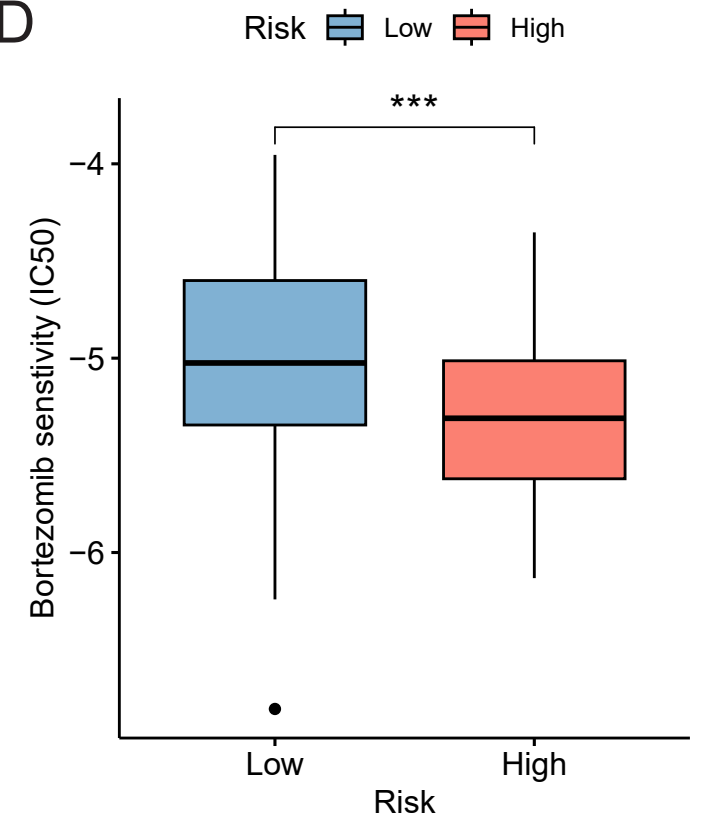

E

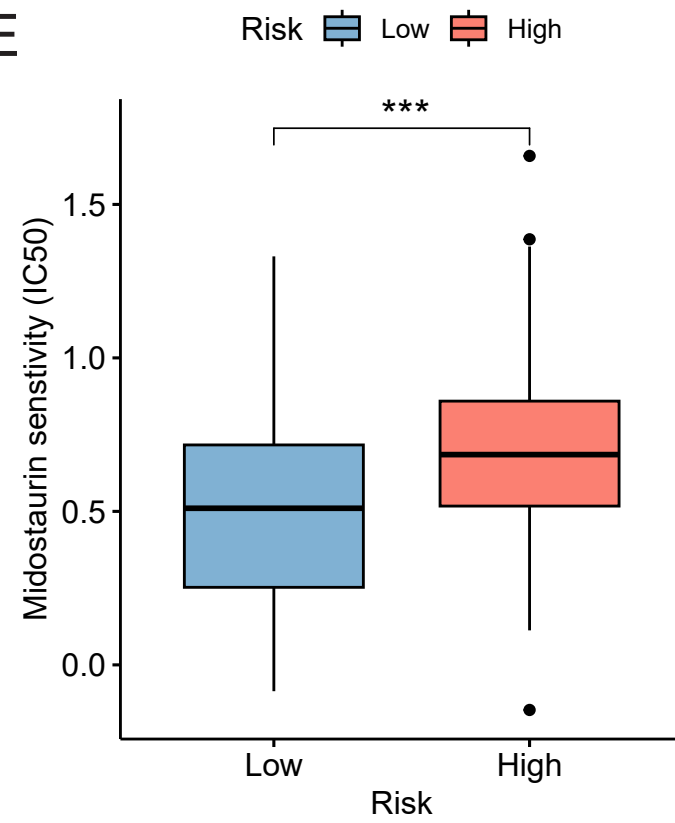

F

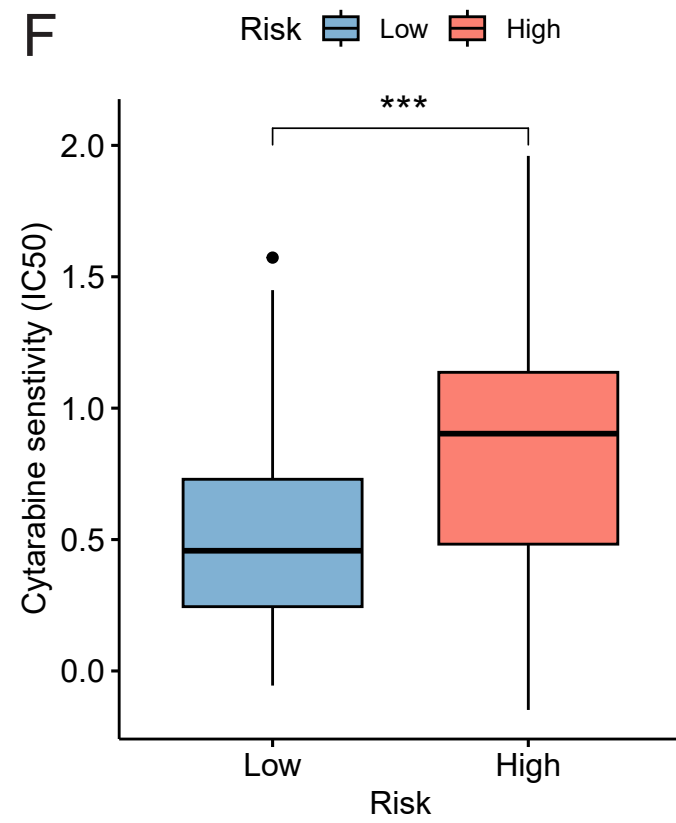

G

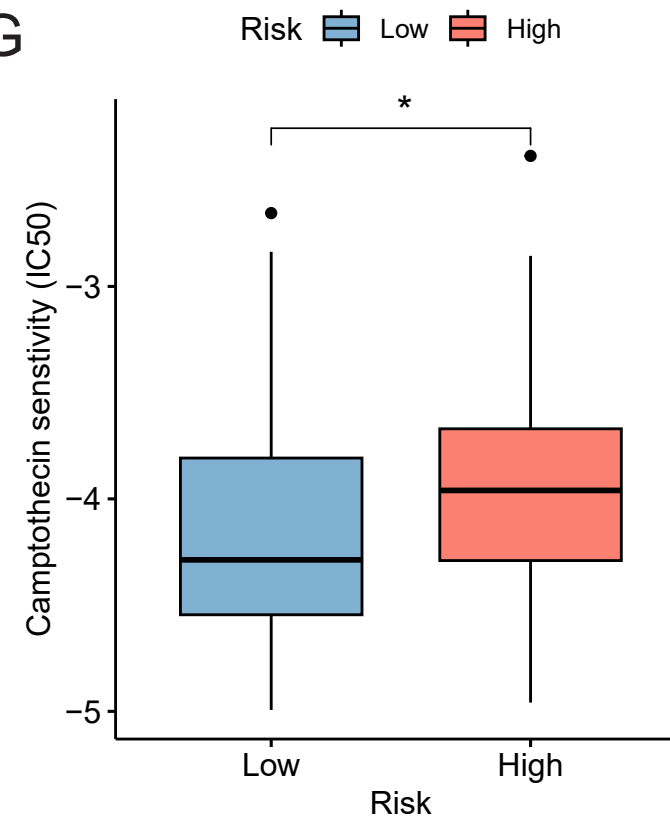

H

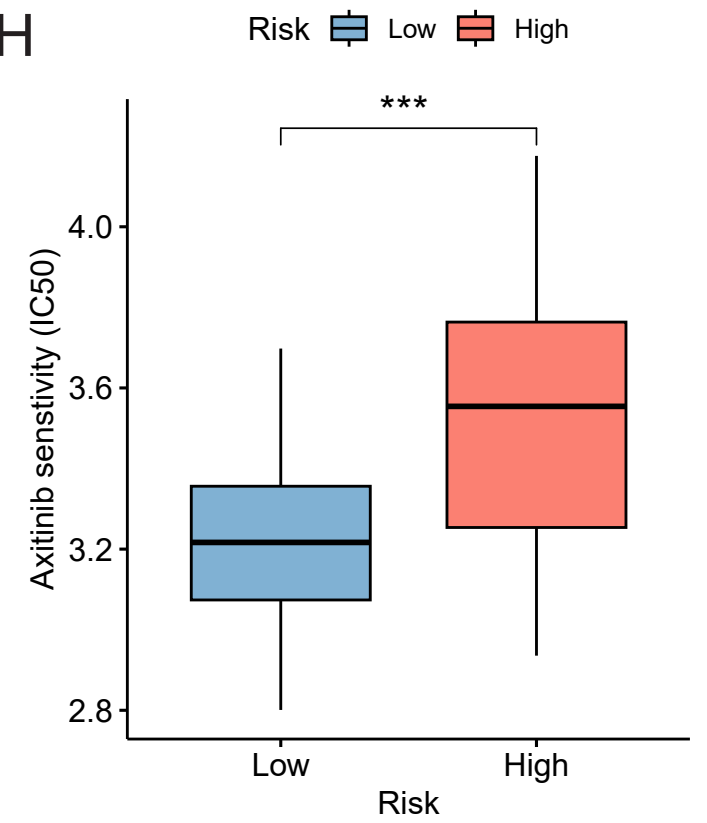

Supplement: f1 [file 5539065.f1.zip]
